# Supplementary material
Source: HighWire-hosted journal article supplement (http://ip.bmjjournals.com/highwire/filestream/145339/field_highwire_adjunct_files/0/IP_TableA_022491.docx)
Supplement: IP_TableA_022491.docx [file IP_TableA_022491.docx]

Table A Cause-of-death codes for selected suicide methods according to ICD-9 and ICD-10

|  | | ICD-9 external cause  (1981-1999) | ICD-10 external cause  (2000-2006) |
| --- | --- | --- | --- |
| Hanging | | E953 | X70 |
| Firearms and explosives | | E955 | X72-X75 |
| Solid or liquid poisoning | | E950 | X60-X65, X68-X69 |
| Gas poisoning | | E951-E952 | X66-X67 |
| Other* | | E954, E956, E957 et E958 | X71, X76-X79, X80, X81-X84 |
| All methods | | E950-E959 | X60-X84, Y87.0 |
| * | Jumping/Falling from high place/Drowning/Moving object/Sharp object. | | |
